# Supplementary material
Source: publisher figshare collection journal article supplement (https://asha.figshare.com/articles/dataset/_/13224632)
Supplement: Supplementary file 1 [file 1]

## S2. Supplemental Materials

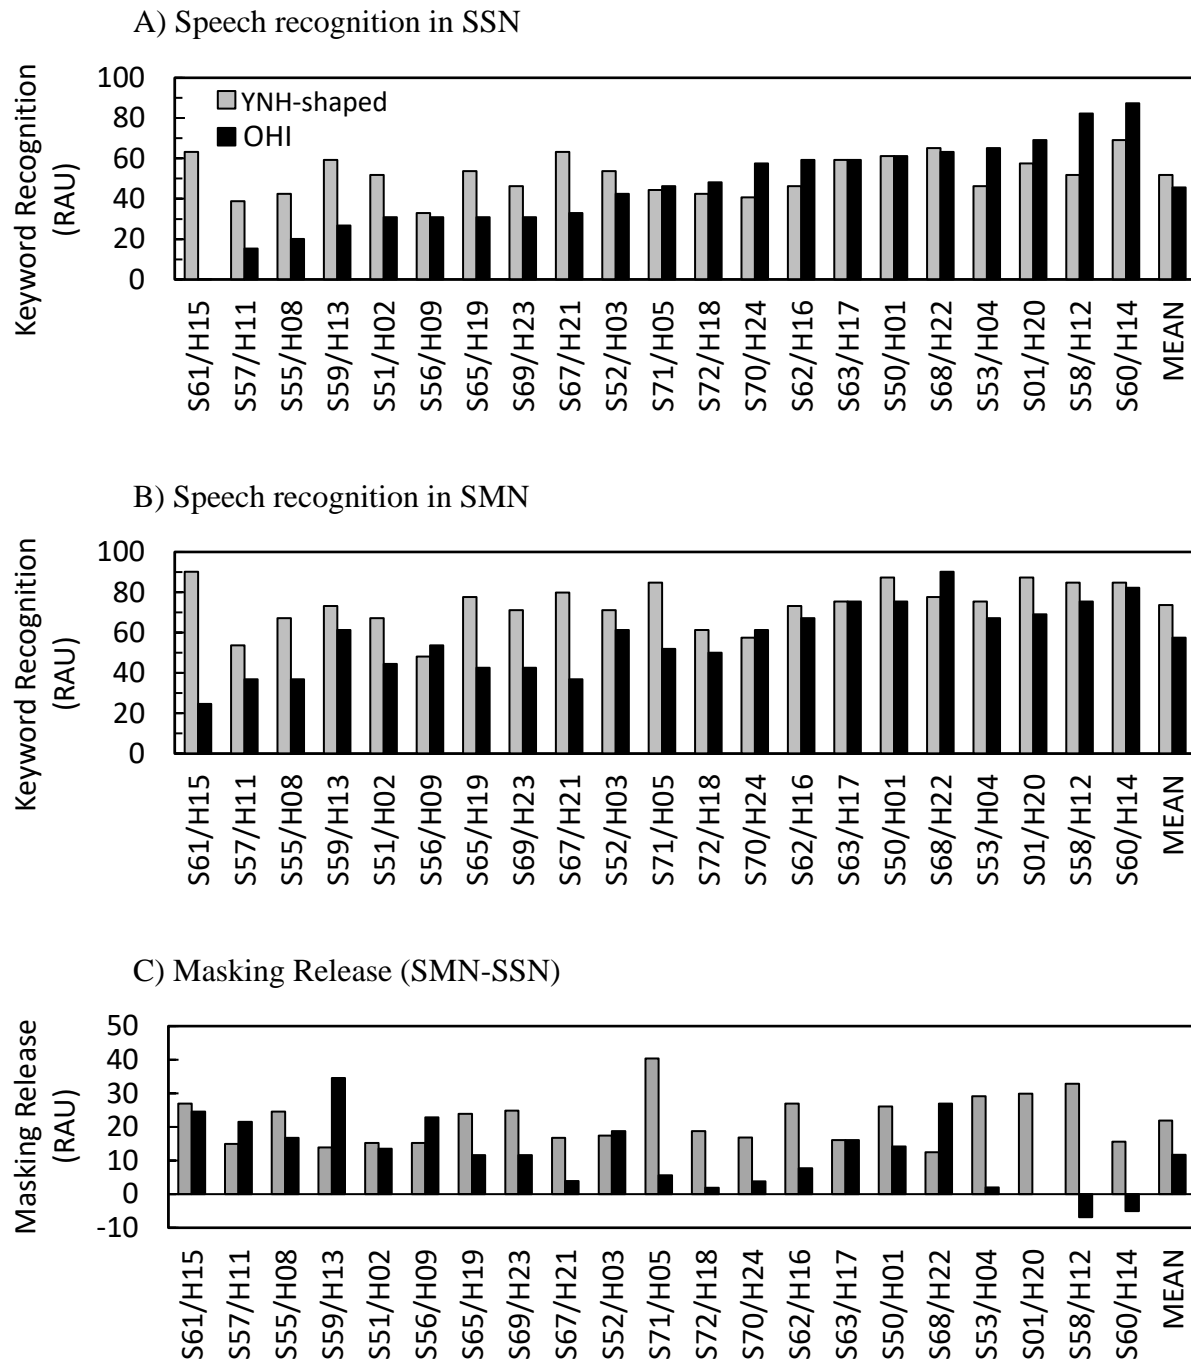

**Figure S2.** Speech recognition results in (A) SSN, (B) SMN, and (C) masking release. Results are plotted for the YNH-shaped/OHI subject pairs (younger listeners in grey and older listeners in black). Subject pairings are ordered according to the OHI performance in SSN.
