# Supplementary material
Source: publisher figshare collection journal article supplement (https://asha.figshare.com/articles/dataset/_/13224632)
Supplement: Supplementary file 2 [file 1]

S4. Supplemental Materials

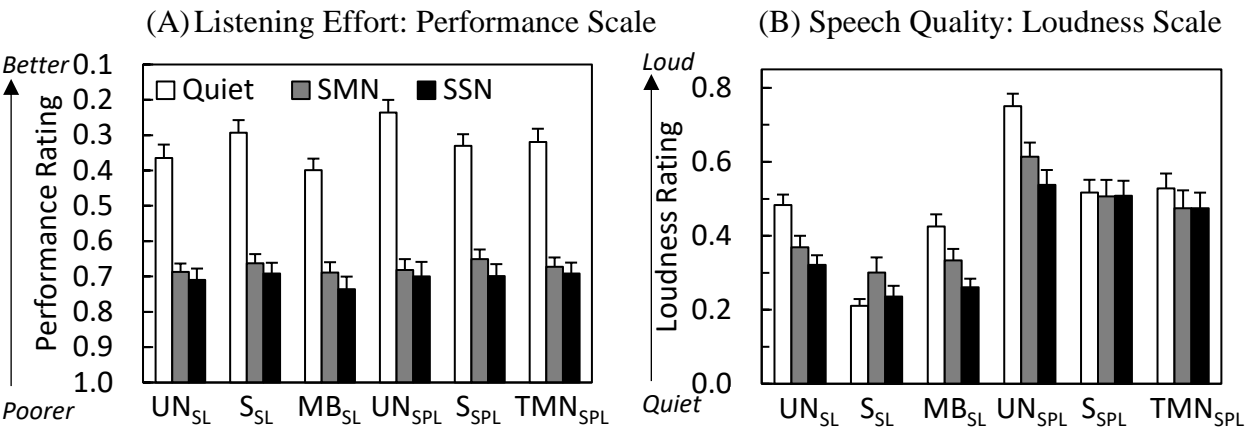

**Figure S4.** Excluded subscales. (A) Results for the performance subscale measured in Exp. 2b for the NASA-TLX listening effort subjective ratings. (B) Results for the loudness subscale measures in Exp. 2c for measures of perceived speech quality.
