# Supplementary material
Source: publisher figshare collection journal article supplement (https://asha.figshare.com/articles/dataset/_/13224632)
Supplement: Supplementary file 3 [file 1]

## S1. Supplemental Materials

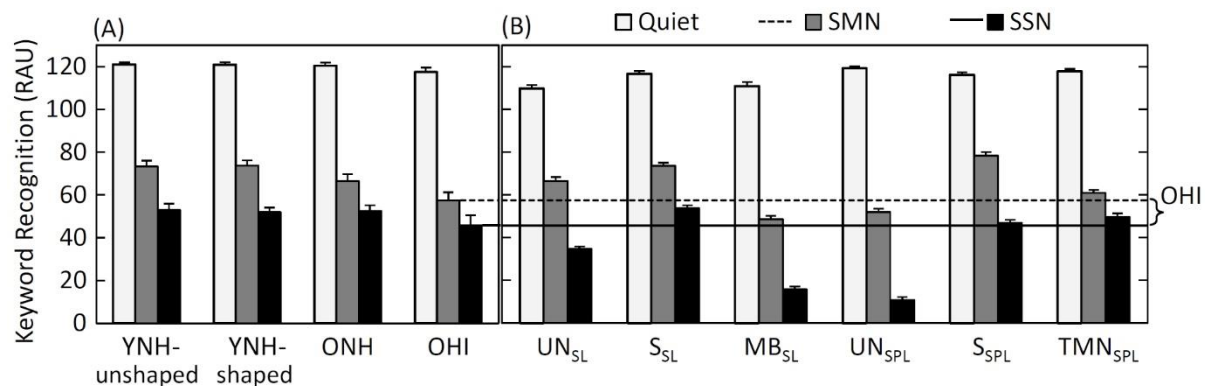

**Figure S1.** Speech recognition scores for (A) Exp. 1 and (B) Exp. 2a. Scores in Exp. 2 for YNH simulated conditions were compared relative to OHI scores. To facilitate this comparison, solid and dashed lines indicate performance for older hearing-impaired (OHI) listeners in speech-shaped noise (SSN) and speech-modulated noise (SMN), respectively. Error bars indicate the standard error of the mean. Quiet condition scores are provided as a reference to indicate maximum expected performance.
