# Supplementary material
Source: publisher figshare collection journal article supplement (https://asha.figshare.com/articles/dataset/_/13224632)
Supplement: Supplementary file 4 [file 1]

### S3. Supplemental Materials

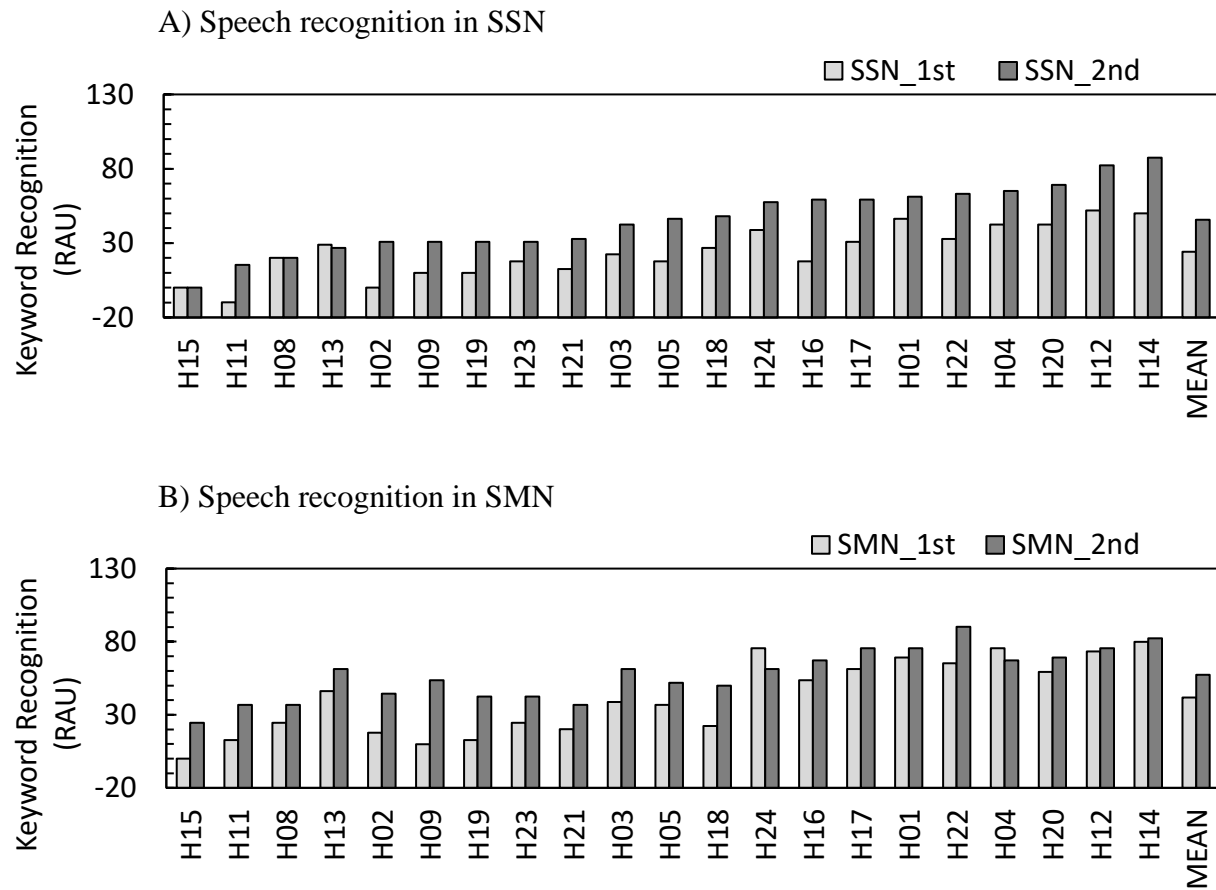

**Figure S3.** Results for individual OHI listeners on the the 1<sup>st</sup> and 2<sup>nd</sup> trial of the speech-in-noise testing from the larger project. Only results from the 2<sup>nd</sup> trial were used for comparison in Exp. 1.
