# Supplementary material
Source: publisher figshare collection journal article supplement (https://asha.figshare.com/articles/dataset/_/13224632)
Supplement: Supplementary file 5 [file 1]

## S5. Supplemental Materials

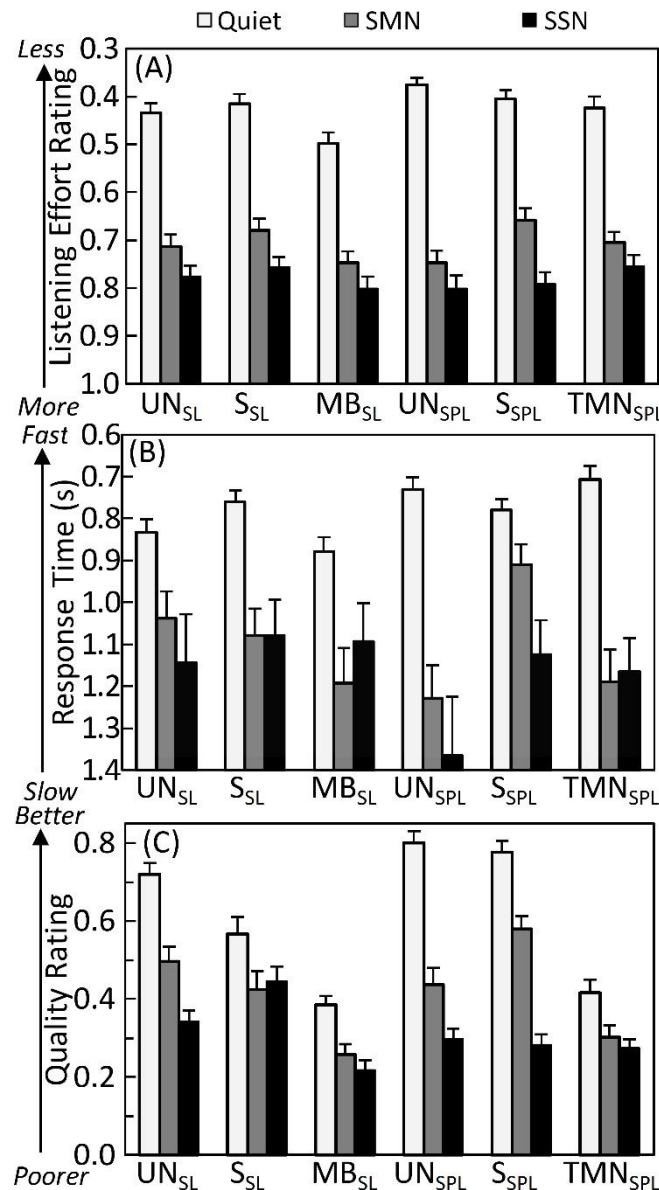

**Figure S5.** (A) Listening effort ratings, (B) response times, and (C) speech quality ratings for young normal-hearing listeners. Effort and response time measures were collected in Exp. 2b and quality in Exp. 2c. To facilitate comparisons, scores are plotted so that up indicates better perception (i.e., less effort, faster response times, or higher quality). Error bars indicate the standard error of the mean. Quiet scores (white bars) are provided as a reference to indicate maximum performance.
